# Supplementary material
Source: MDPI journal article supplement (https://www.mdpi.com/2076-3417/13/9/5415)
Supplement: s1 [file s1]

Supplementary Material

**Table S1.** Steel samples composition, %.

| Sample | B     | C     | Al    | Si    | Ti   | V    | Cr    | Mn   | Fe   | Co   | Ni    | Cu    | Nb    | Mo   | W    |
|--------|-------|-------|-------|-------|------|------|-------|------|------|------|-------|-------|-------|------|------|
| S1     | NA    | NA    | 0.81  | 0.47  | NA   | NA   | 1.78  | 0.29 | NA   | NA   | 0.21  | 0.28  | NA    | 0.18 | NA   |
| S2     | NA    | 0.44  | NA    | 0.18  | NA   | NA   | 1.88  | 0.22 | NA   | NA   | 0.75  | NA    | NA    | NA   | NA   |
| S3     | NA    | 0.52  | NA    | 0.32  | NA   | NA   | 0.92  | 0.59 | NA   | NA   | 0.50  | NA    | NA    | NA   | NA   |
| S4     | NA    | 0.42  | NA    | 0.51  | NA   | NA   | 0.60  | 1.09 | NA   | NA   | 0.35  | NA    | NA    | NA   | NA   |
| S5     | NA    | 0.42  | NA    | 0.51  | NA   | NA   | 0.60  | 1.09 | NA   | NA   | 0.35  | NA    | NA    | NA   | NA   |
| S6     | NA    | 0.51  | NA    | 0.61  | NA   | NA   | 0.31  | 2.02 | NA   | NA   | 0.21  | NA    | NA    | NA   | NA   |
| S7     | NA    | 0.050 | NA    | 0.794 | NA   | NA   | 19.68 | 1.28 | NA   | NA   | 10.89 | 0.116 | 1.02  | NA   | NA   |
| S8     | NA    | 0.060 | NA    | 0.469 | NA   | NA   | 17.61 | 1.50 | NA   | NA   | 12.80 | 0.222 | 0.677 | NA   | NA   |
| S9     | NA    | 0.050 | NA    | 0.311 | NA   | NA   | 15.66 | 2.23 | NA   | NA   | 14.90 | 0.344 | 0.465 | NA   | NA   |
| S10    | NA    | 0.37  | NA    | 0.15  | NA   | NA   | 0.32  | 1.03 | NA   | NA   | 1.52  | NA    | NA    | NA   | NA   |
| S11    | NA    | 0.39  | NA    | 0.21  | NA   | NA   | 0.52  | 0.68 | NA   | NA   | 1.27  | NA    | NA    | NA   | NA   |
| S12    | NA    | 0.4   | NA    | 0.34  | NA   | NA   | 0.77  | 0.52 | NA   | NA   | 0.97  | NA    | NA    | NA   | NA   |
| S13    | NA    | 0.44  | NA    | 0.60  | NA   | NA   | 1.08  | 0.29 | NA   | NA   | 0.77  | NA    | NA    | NA   | NA   |
| S14    | 0.001 | 0.02  | 2.65  | 0.23  | 2.07 | NA   | 10.33 | 0.23 | NA   | NA   | 37.80 | NA    | NA    | NA   | 1.18 |
| S15    | 0.010 | 0.02  | 1.39  | 0.37  | 2.57 | NA   | 12.30 | 0.38 | NA   | NA   | 32.60 | NA    | NA    | NA   | 2.04 |
| S16    | 0.020 | 0.02  | 0.67  | 0.49  | 2.90 | NA   | 14.70 | 0.53 | NA   | NA   | 30.00 | NA    | NA    | NA   | 3.30 |
| S17    | 0.03  | 0.03  | 0.29  | 0.79  | 3.05 | NA   | 17.70 | 0.86 | NA   | NA   | 23.43 | NA    | NA    | NA   | 3.93 |
| S18    | NA    | 0.02  | 0.17  | 1.08  | 0.85 | NA   | 20.20 | 0.15 | 4.09 | NA   | NA    | 0.12  | 0.60  | 1.53 | NA   |
| S19    | NA    | 0.03  | 0.32  | 0.85  | 0.65 | NA   | 20.20 | 0.25 | 2.52 | NA   | NA    | 0.16  | 0.80  | 1.90 | NA   |
| S20    | NA    | 0.02  | 0.50  | 0.56  | 0.49 | NA   | 20.02 | 0.41 | 1.50 | NA   | NA    | 0.25  | 1.10  | 2.28 | NA   |
| S21    | NA    | 0.03  | 0.86  | 0.43  | 0.33 | NA   | 20.03 | 0.57 | 0.96 | NA   | NA    | 0.38  | 1.56  | 2.84 | NA   |
| S22    | NA    | 0.050 | NA    | 0.85  | NA   | NA   | 21.01 | 4.53 | NA   | NA   | 2.38  | NA    | NA    | NA   | NA   |
| S23    | NA    | 0.080 | NA    | 0.61  | NA   | NA   | 16.96 | 6.65 | NA   | NA   | 3.42  | NA    | NA    | NA   | NA   |
| S24    | NA    | 0.060 | NA    | 0.25  | NA   | NA   | 12.72 | 8.68 | NA   | NA   | 5.04  | NA    | NA    | NA   | NA   |
| S25    | NA    | 0.4   | NA    | 2.74  | NA   | NA   | 7.99  | 0.90 | NA   | NA   | 0.85  | NA    | NA    | 1.00 | NA   |
| S26    | NA    | 0.42  | NA    | 2.26  | NA   | NA   | 9.05  | 0.52 | NA   | NA   | 0.57  | NA    | NA    | 0.78 | NA   |
| S27    | NA    | 0.42  | NA    | 1.87  | NA   | NA   | 10.05 | 0.30 | NA   | NA   | 0.25  | NA    | NA    | 0.48 | NA   |
| S28    | NA    | 0.41  | NA    | 1.60  | NA   | NA   | 10.91 | 0.14 | NA   | NA   | 0.13  | NA    | NA    | 0.24 | NA   |
| S29    | NA    | 0.07  | 0.35  | 1.05  | NA   | NA   | 19.45 | 1.02 | NA   | NA   | 4.96  | NA    | NA    | NA   | NA   |
| S30    | NA    | 0.06  | 0.61  | 0.58  | NA   | NA   | 16.35 | 0.57 | NA   | NA   | 6.38  | NA    | NA    | NA   | NA   |
| S31    | NA    | 0.06  | 0.89  | 0.42  | NA   | NA   | 14.39 | 0.39 | NA   | NA   | 7.71  | NA    | NA    | NA   | NA   |
| S32    | NA    | 0.020 | 0.230 | 0.53  | 0.34 | NA   | 0.56  | 0.34 | NA   | 20.2 | 26.37 | 0.34  | NA    | NA   | NA   |
| S33    | NA    | 0.020 | 0.410 | 0.36  | 0.29 | NA   | 0.54  | 0.54 | NA   | 17.4 | 30.10 | 0.230 | NA    | NA   | NA   |
| S34    | NA    | 0.030 | 0.620 | 0.2   | 0.2  | NA   | 0.73  | 0.75 | NA   | 14.4 | 34.00 | 0.130 | NA    | NA   | NA   |
| S35    | NA    | NA    | NA    | 0.031 | NA   | 0.48 | 1.61  | 0.71 | NA   | NA   | 0.18  | 0.18  | 0.03  | 0.45 | NA   |
| S36    | NA    | NA    | NA    | 0.13  | NA   | 0.31 | 1.73  | 0.64 | NA   | NA   | 0.25  | 0.20  | 0.15  | 0.68 | NA   |
| S37    | NA    | NA    | NA    | 0.27  | NA   | 0.21 | 1.28  | 0.44 | NA   | NA   | 0.40  | 0.38  | 0.24  | 0.85 | NA   |
| S38    | NA    | NA    | NA    | 0.54  | NA   | 0.1  | 0.95  | 0.24 | NA   | NA   | 0.62  | 0.50  | 0.35  | 1.19 | NA   |
| S39    | NA    | NA    | 2.16  | 0.14  | NA   | NA   | 0.08  | 0.16 | NA   | NA   | 32.9  | NA    | NA    | NA   | NA   |
| S40    | NA    | NA    | 1.67  | 0.27  | NA   | NA   | 0.11  | 0.36 | NA   | NA   | 32.7  | NA    | NA    | NA   | NA   |
| S41    | NA    | NA    | 1.17  | 0.56  | NA   | NA   | 0.17  | 0.53 | NA   | NA   | 32.7  | NA    | NA    | NA   | NA   |
| S42    | NA    | NA    | 0.82  | 0.93  | NA   | NA   | 0.31  | 0.73 | NA   | NA   | 31.1  | NA    | NA    | NA   | NA   |

**Table S2.** Ore samples composition, %

| Sample | C    | Fe    | Na | Ti   | Si   | Al   | K  | Mn   | Mg   |
|--------|------|-------|----|------|------|------|----|------|------|
| O1     | 0.24 | 38.21 | NA | 0.36 | 7.75 | 5.48 | NA | 0.33 | 1.31 |

---

|     |      |       |      |       |       |       |       |      |       |
|-----|------|-------|------|-------|-------|-------|-------|------|-------|
| O2  | 0.29 | 28.03 | 0.50 | 0.06  | 22.95 | 2.07  | 1.07  | 0.05 | 1.19  |
| O3  | 0.06 | 35.17 | 0.04 | 0.03  | 19.43 | 0.88  | 0.29  | 0.05 | 0.05  |
| O4  | 1.13 | 59.45 | 0.07 | 0.02  | 3.74  | 0.53  | 0.13  | 0.36 | 0.13  |
| O5  | 0.16 | 62.21 | 0.02 | 0.04  | 1.58  | 0.73  | 0.06  | 0.08 | 1.68  |
| O6  | 0.06 | 56.16 | NA   | NA    | 8.17  | 0.58  | NA    | 0.05 | 0.02  |
| O7  | NA   | 32.98 | NA   | NA    | 1.07  | 0.34  | NA    | NA   | 6.57  |
| O8  | NA   | 68.21 | NA   | 0.01  | 0.27  | 0.17  | NA    | 0.01 | 0.01  |
| O9  | 0.03 | 63.19 | 0.12 | 0.03  | 2.86  | 0.62  | 0.08  | 0.12 | 0.45  |
| O10 | NA   | NA    | NA   | NA    | NA    | NA    | NA    | NA   | NA    |
| O11 | NA   | 43.36 | 0.07 | 0.08  | 6.43  | 2.51  | 0.29  | 1.91 | 0.45  |
| O12 | 0.94 | 25.97 | NA   | 0.20  | 13.16 | 3.93  | 0.51  | 1.55 | 2.00  |
| O13 | 0.06 | 43.27 | 0.05 | 6.22  | 3.63  | 5.18  | 0.11  | 0.19 | 1.84  |
| O14 | 0.03 | 24.38 | NA   | 23.62 | 0.58  | 1.05  | NA    | NA   | NA    |
| O15 | 0.50 | 9.65  | NA   | NA    | 3.22  | 3.75  | NA    | NA   | 11.28 |
| O16 | 0.13 | 10.30 | 0.26 | 0.05  | 2.21  | 4.36  | 0.04  | 0.12 | 9.70  |
| O17 | 0.11 | NA    | NA   | 0.02  | 3.34  | 0.39  | NA    | NA   | 0.39  |
| O18 | 1.30 | NA    | 0.37 | 0.04  | 3.80  | 1.39  | 0.17  | NA   | 0.42  |
| O19 | 0.81 | NA    | 0.05 | 0.22  | 5.07  | 4.91  | 0.01  | NA   | 0.48  |
| O20 | 0.90 | NA    | 0.23 | 0.11  | 7.33  | 2.79  | 0.69  | NA   | 0.27  |
| O21 | 0.35 | NA    | 0.42 | 0.13  | 22.28 | 5.18  | 4.14  | NA   | 0.45  |
| O22 | 1.14 | NA    | 0.09 | 0.03  | 5.82  | 1.39  | 0.42  | NA   | 0.14  |
| O23 | 6.09 | NA    | 0.04 | 0.04  | 2.90  | 1.02  | 0.03  | NA   | 1.81  |
| O24 | 6.05 | NA    | 0.15 | 0.03  | 7.51  | 0.75  | 0.09  | NA   | 0.57  |
| O25 | NA   | NA    | NA   | 0.04  | 2.90  | 1.02  | NA    | NA   | 1.81  |
| O26 | NA   | NA    | NA   | 0.06  | 2.86  | 0.55  | 0.09  | NA   | NA    |
| O27 | NA   | NA    | 2.85 | NA    | NA    | NA    | 3.51  | NA   | 0.04  |
| O28 | NA   | 18.02 | 0.68 | 0.12  | 10.35 | 2.73  | 1.33  | 1.71 | 5.16  |
| O29 | 8.36 | 1.59  | NA   | 0.02  | 9.66  | 0.37  | 0.15  | 0.05 | 7.18  |
| O30 | NA   | NA    | NA   | NA    | NA    | NA    | NA    | NA   | NA    |
| O31 | NA   | 0.66  | NA   | 0.03  | 21.43 | 1.06  | NA    | NA   | NA    |
| O32 | NA   | 26.22 | 0.02 | 0.44  | 16.09 | 1.90  | NA    | NA   | 0.09  |
| O33 | NA   | 11.12 | NA   | NA    | 1.28  | 4.03  | NA    | 0.12 | NA    |
| O34 | NA   | 11.12 | NA   | 0.10  | 2.66  | 11.38 | NA    | 0.10 | NA    |
| O35 | NA   | 8.32  | NA   | 0.03  | 7.95  | 2.82  | NA    | 0.14 | NA    |
| O36 | NA   | 10.07 | NA   | 0.08  | 10.24 | 2.39  | NA    | 0.14 | NA    |
| O37 | NA   | 2.73  | NA   | NA    | NA    | NA    | NA    | NA   | NA    |
| O38 | NA   | 13.85 | NA   | NA    | NA    | NA    | 28.17 | NA   | NA    |
| O39 | NA   | 2.76  | 0.95 | 1.54  | 31.33 | 8.65  | 1.73  | 0.02 | 0.43  |
| O40 | NA   | 33.85 | NA   | 0.22  | 8.32  | 1.12  | NA    | 2.15 | 0.89  |
| O41 | <DL  | <DL   | <DL  | <DL   | <DL   | <DL   | 0.34  | <DL  | <DL   |
| O42 | 0.22 | 62.53 | 0.05 | 0.01  | 1.09  | 1.00  | 0.01  | 0.18 | 1.95  |
| O43 | 0.27 | 51.75 | 0.14 | 0.08  | 3.23  | 1.98  | 0.05  | 0.03 | 3.50  |
| O44 | 0.03 | 64.06 | 0.07 | 0.01  | 0.71  | 0.89  | 0.02  | 0.17 | 3.24  |
| O45 | 1.10 | 48.08 | 0.09 | 0.01  | 2.03  | 1.41  | 0.17  | 0.05 | 2.08  |
| O46 | 0.06 | 53.55 | <DL  | 0.07  | 3.43  | 1.97  | 0.01  | 0.28 | 4.10  |
| O47 | 0.04 | 59.10 | 0.02 | 0.05  | 1.15  | 2.40  | <DL   | 0.15 | 5.22  |
| O48 | 0.04 | 64.56 | 0.03 | 0.01  | 1.37  | 1.63  | 0.01  | 0.04 | 2.30  |
| O49 | <DL  | 60.43 | <DL  | 0.25  | 1.49  | 2.48  | 0.01  | 0.19 | 2.69  |
| O50 | 0.04 | 61.98 | 0.04 | 0.01  | 1.63  | 1.61  | 0.02  | 0.12 | 2.42  |
| O51 | 1.96 | 40.37 | 0.04 | <DL   | 10.22 | 0.37  | 0.02  | 0.02 | 0.63  |
| O52 | 0.58 | 43.99 | 0.30 | 0.10  | 6.56  | 1.93  | 0.21  | <DL  | 5.04  |

|     |      |       |      |      |       |      |      |      |      |
|-----|------|-------|------|------|-------|------|------|------|------|
| O53 | 0.04 | 61.69 | <DL  | 0.03 | 2.01  | 2.04 | 0.04 | 0.21 | 1.65 |
| O54 | 0.92 | 55.36 | <DL  | 0.02 | 1.63  | 1.63 | 0.01 | 0.22 | 2.56 |
| O55 | 1.06 | 56.62 | 0.02 | 0.02 | 1.51  | 1.16 | 0.01 | 0.05 | 1.80 |
| O56 | 0.07 | 57.67 | 0.10 | 0.08 | 2.74  | 2.31 | 0.02 | 0.20 | 2.52 |
| O57 | 0.07 | 52.18 | 0.02 | 0.05 | 4.87  | 1.67 | 0.01 | 0.24 | 3.41 |
| O58 | 1.25 | 56.96 | 0.02 | 0.01 | 1.09  | 1.05 | 0.01 | 0.14 | 2.29 |
| O59 | 0.10 | 62.10 | 0.02 | 0.11 | 1.73  | 1.52 | 0.02 | 0.09 | 2.05 |
| O60 | 0.03 | 11.97 | 0.89 | 0.33 | 18.08 | 8.35 | 1.18 | 0.09 | 3.65 |
| O61 | <DL  | 11.92 | 0.61 | 0.11 | 18.11 | 7.79 | 0.69 | 0.12 | 7.06 |
| O62 | 0.08 | 11.41 | 0.78 | 0.34 | 19.62 | 6.41 | 0.42 | 0.14 | 7.85 |
| O63 | 0.05 | 11.13 | 1.22 | 0.55 | 17.67 | 6.17 | 0.05 | 0.19 | 2.50 |
| O64 | <DL  | 49.90 | 0.23 | 0.10 | 2.93  | 1.34 | 0.26 | 0.12 | 0.86 |
| O65 | 0.05 | 32.36 | <DL  | 0.19 | 7.84  | 2.41 | <DL  | 0.10 | 2.95 |
| O66 | 0.23 | 2.38  | 2.35 | 0.20 | 35.94 | 5.10 | 0.20 | 0.04 | 0.75 |
| O67 | <DL  | 13.59 | 1.81 | 0.85 | 19.41 | 6.89 | 1.35 | 0.13 | 1.93 |
| O68 | 0.09 | 9.05  | 0.82 | 0.22 | 20.07 | 7.66 | 0.27 | 0.13 | 8.28 |

**Table S3.** Steel and ore test samples

| Element | Test set                                                                                                                                                               |
|---------|------------------------------------------------------------------------------------------------------------------------------------------------------------------------|
| Si      | S6, S7, S9, S16, S21, S24, S28, S32, S33, S34,<br>S39, S41, S42, O2, O5, O9, O11, O13, O16,<br>O24, O25, O28, O29, O35, O43, O44, O48,<br>O57, O58, O59, O63, O67, O68 |
| Al      | S17, S33, S34, S41, S42, O1, O2, O3, O4, O9,<br>O11, O14, O22, O23, O33, O35, O46, O47,<br>O50, O51, O55, O57, O60, O66, O67                                           |
| Ti      | S20, S33, O1, O16, O23, O24, O26, O34,<br>O35, O36, O42, O43, O48, O49, O54, O61,<br>O65, O68                                                                          |
| Mn      | S3, S10, S13, S17, S20, S26, S33, S35, S38,<br>S39, S40, O9, O13, O16, O36, O45, O47,<br>O51, O55, O56, O57, O59, O66, O67                                             |

**Table S4.** Threshold values for concentrations

| Element | Threshold concentration of the element, % |     |
|---------|-------------------------------------------|-----|
|         | Steel                                     | Ore |
| Si      | -                                         | -   |
| Al      | -                                         | -   |
| Ti      | 1                                         | 0.6 |
| Mn      | 1.75                                      | 0.5 |
